# Supplementary material
Source: PubMed Central journal article supplement (PMC8647654)

**Fig.4a**

MDA-MB-231

T47D

Cal51

Lysates  
IgG  
p110 $\alpha$   
p110 $\beta$   
p85 $\alpha$

Lysates  
IgG  
p110 $\alpha$   
p110 $\beta$   
p85 $\alpha$

Lysates  
IgG  
p110 $\alpha$   
p110 $\beta$   
p85 $\alpha$

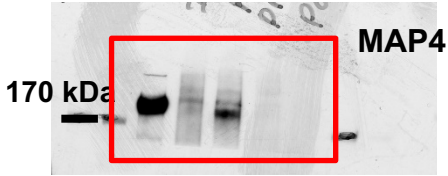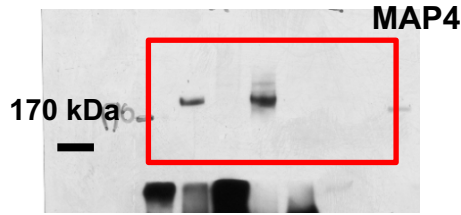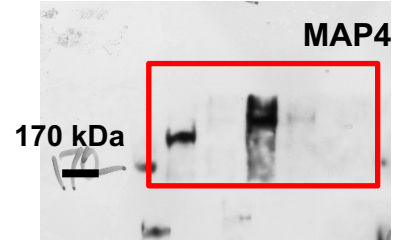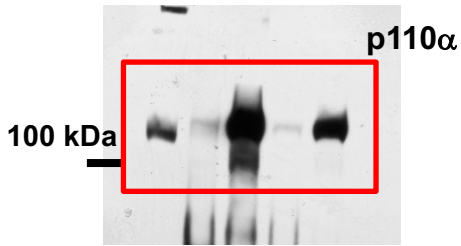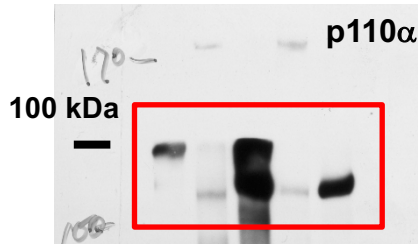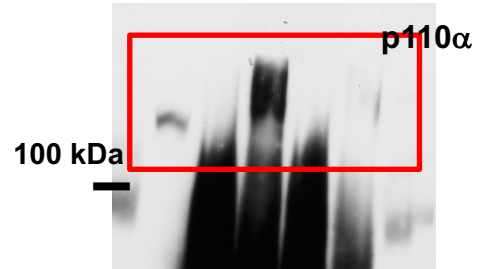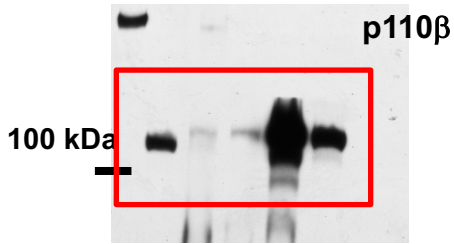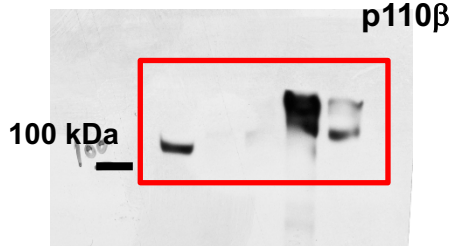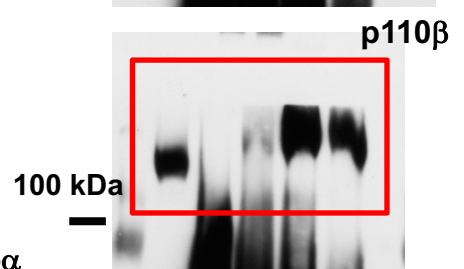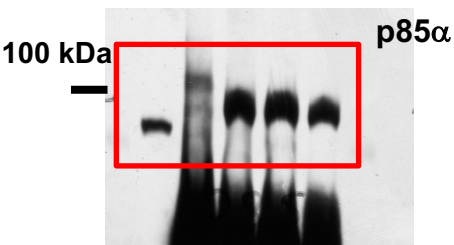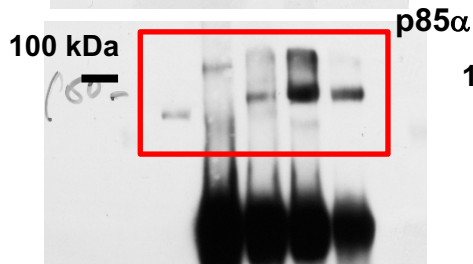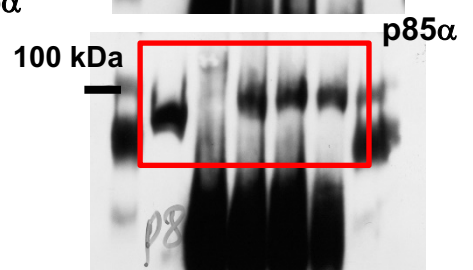

# Fig.4b

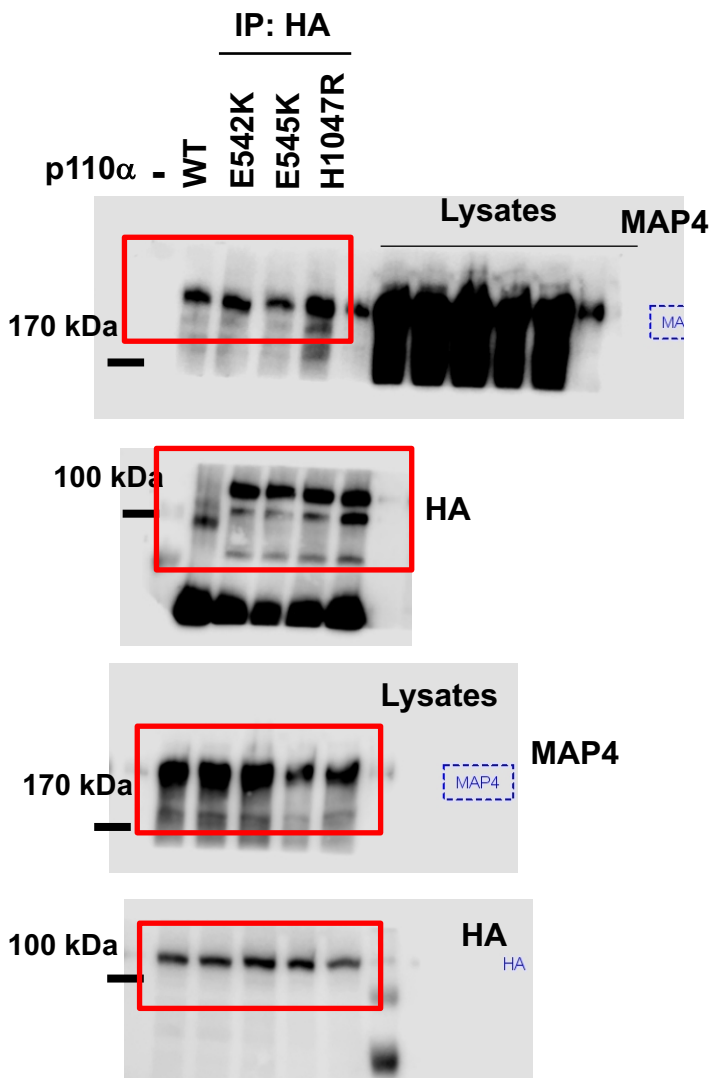

# Fig.4c

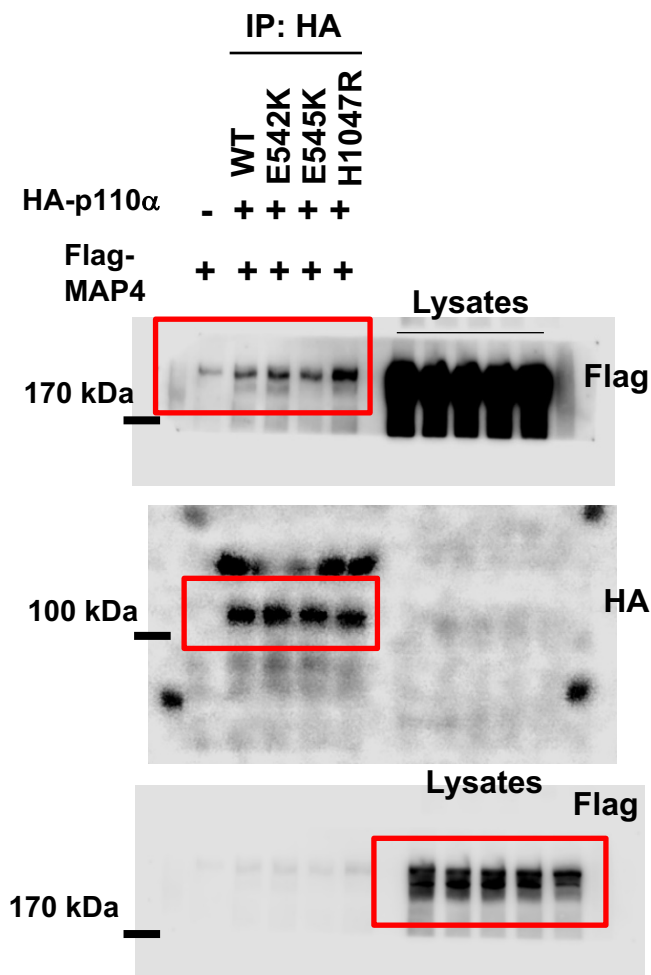

**Fig.4d**

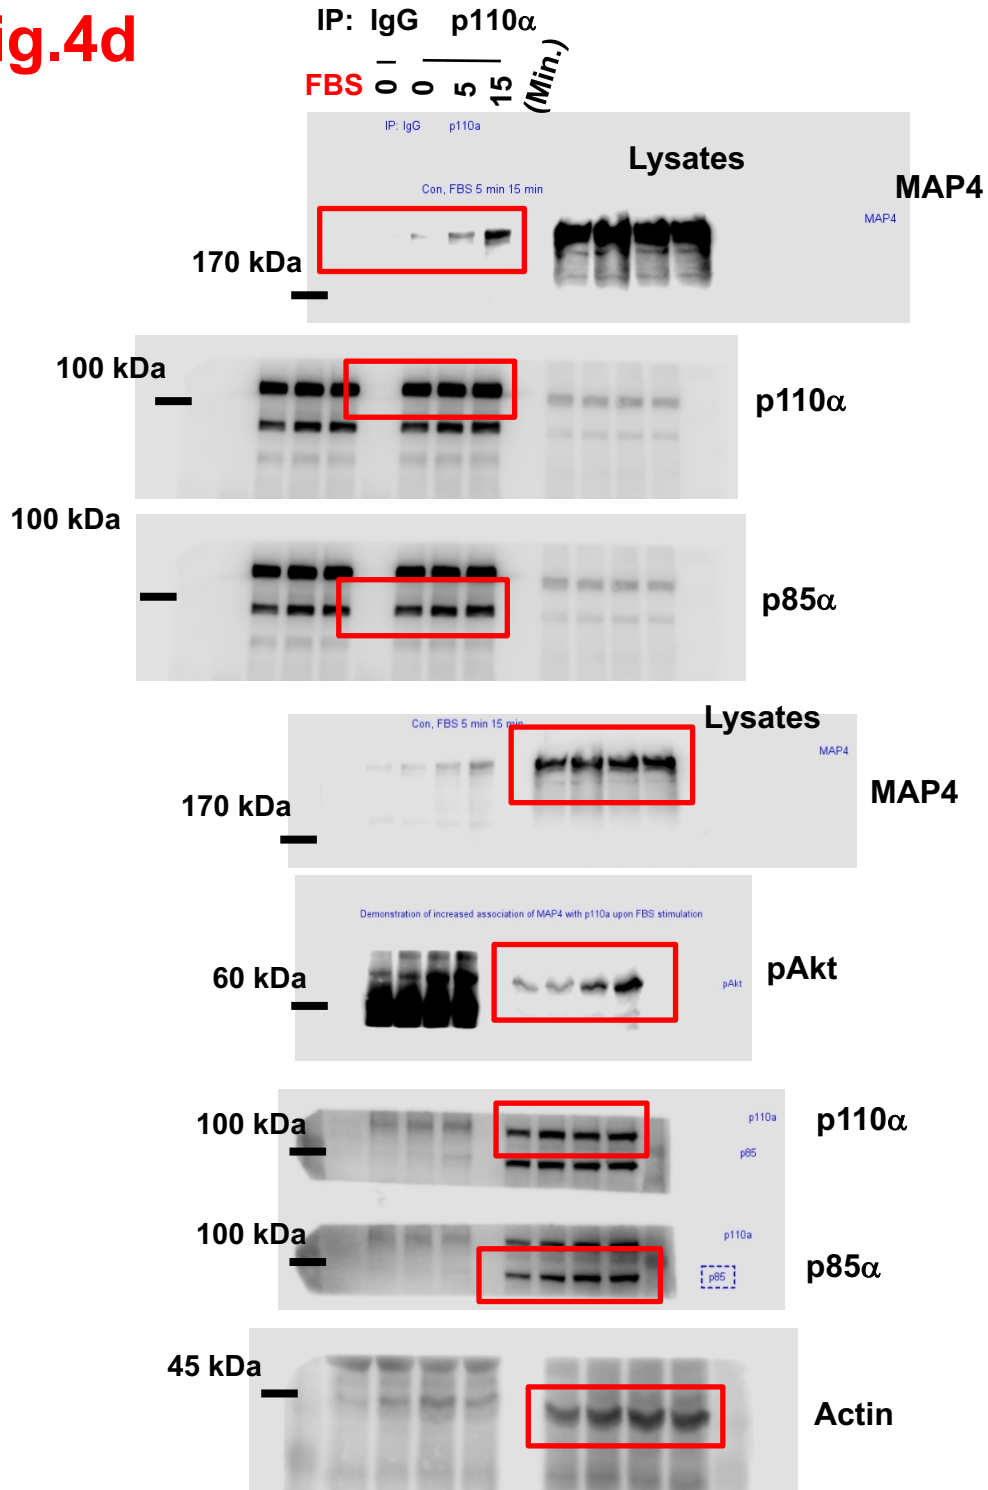



**Fig.4f**

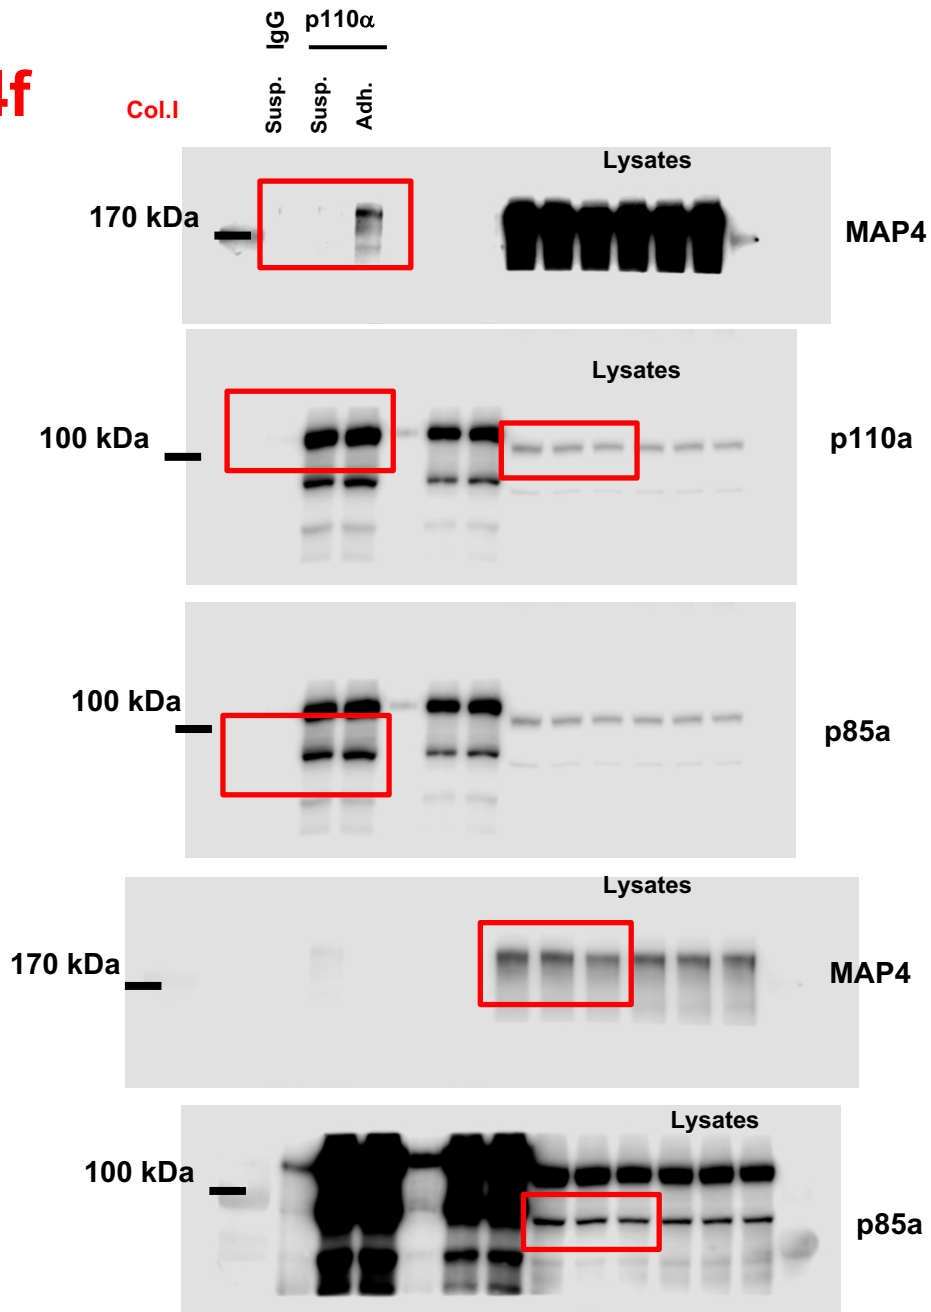

Supplement: NIHMS1689516-supplement-Source_Data_Figure_4.pdf [file NIHMS1689516-supplement-Source_Data_Figure_4.pdf]
