# Supplementary material
Source: PubMed Central journal article supplement (PMC8647654)

# Fig.7a

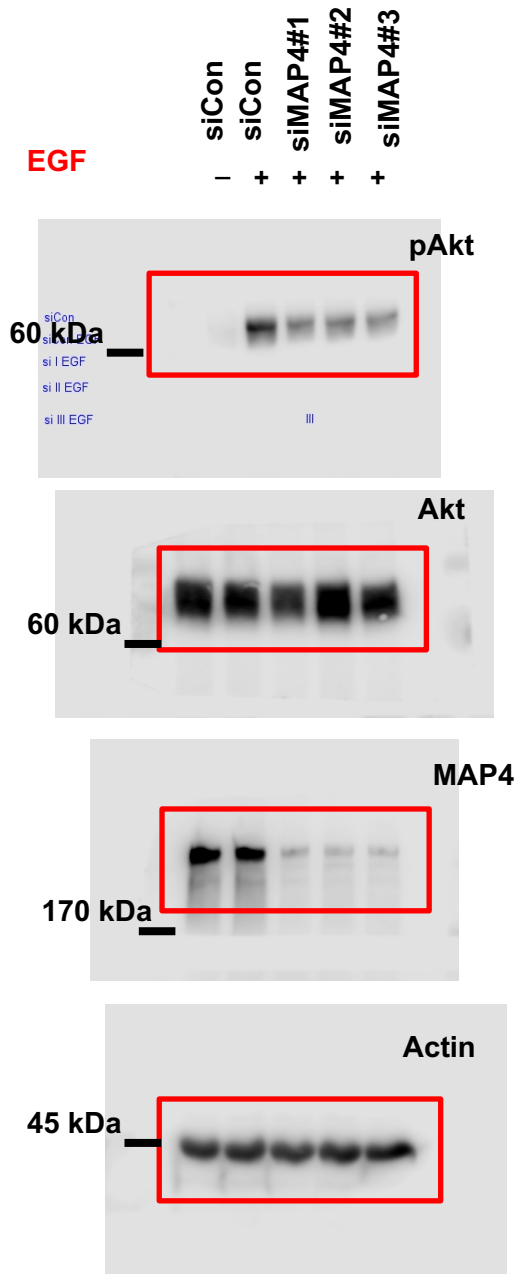

# Fig.7b

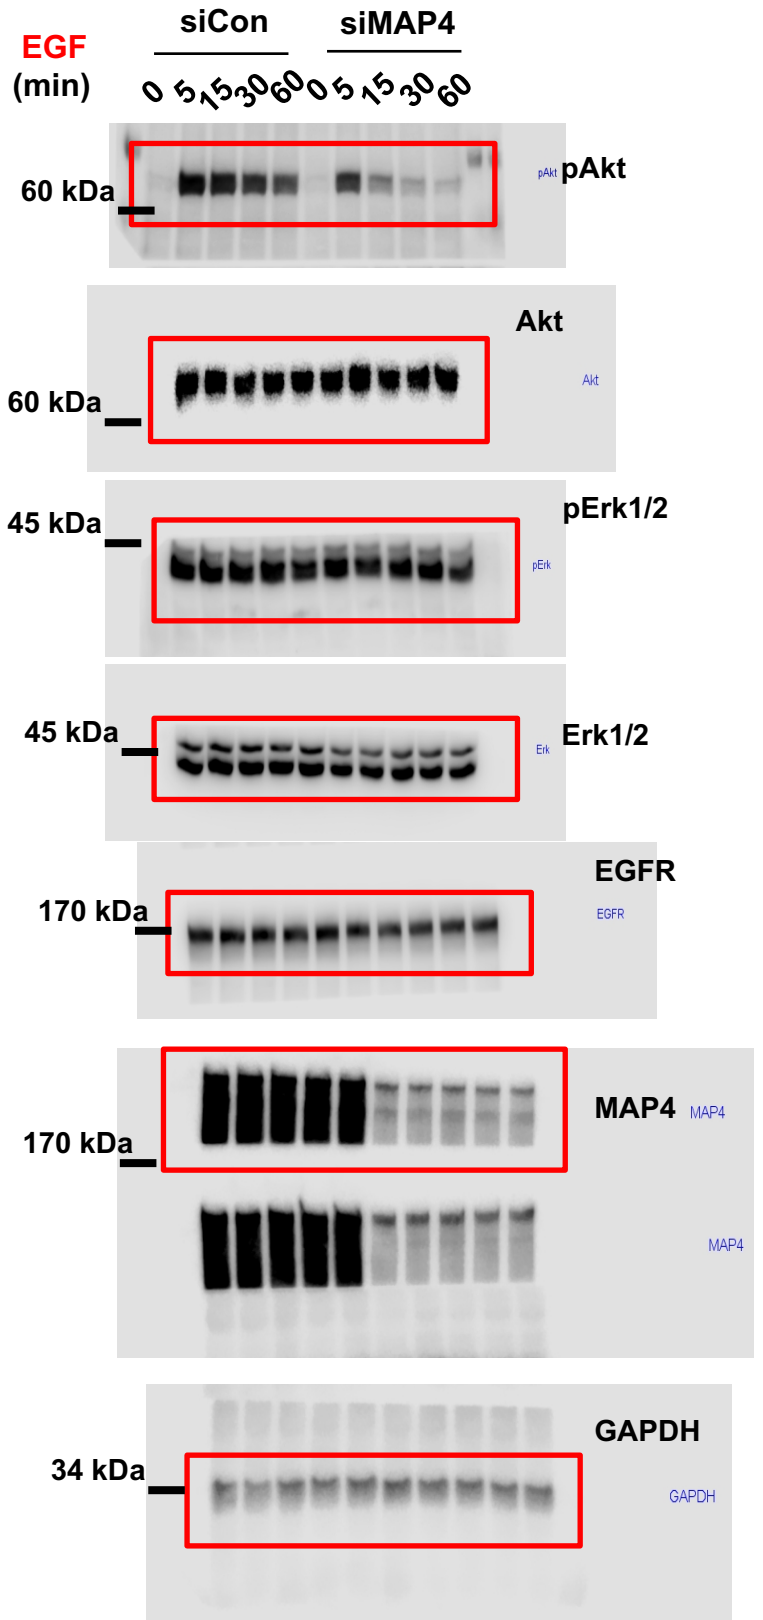

# Fig.7c

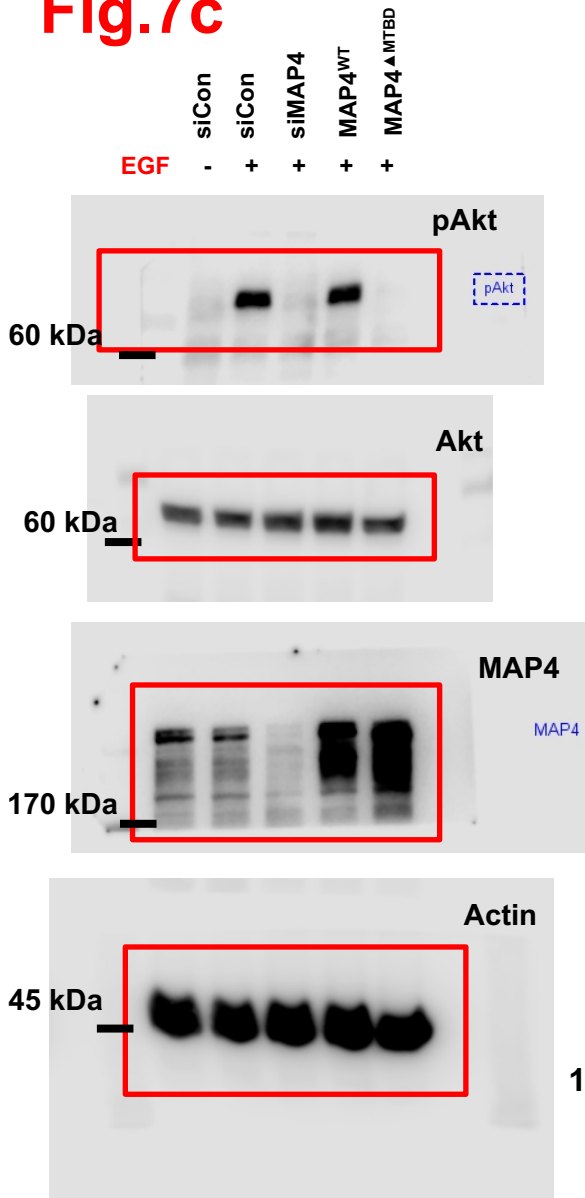

# Fig.7f

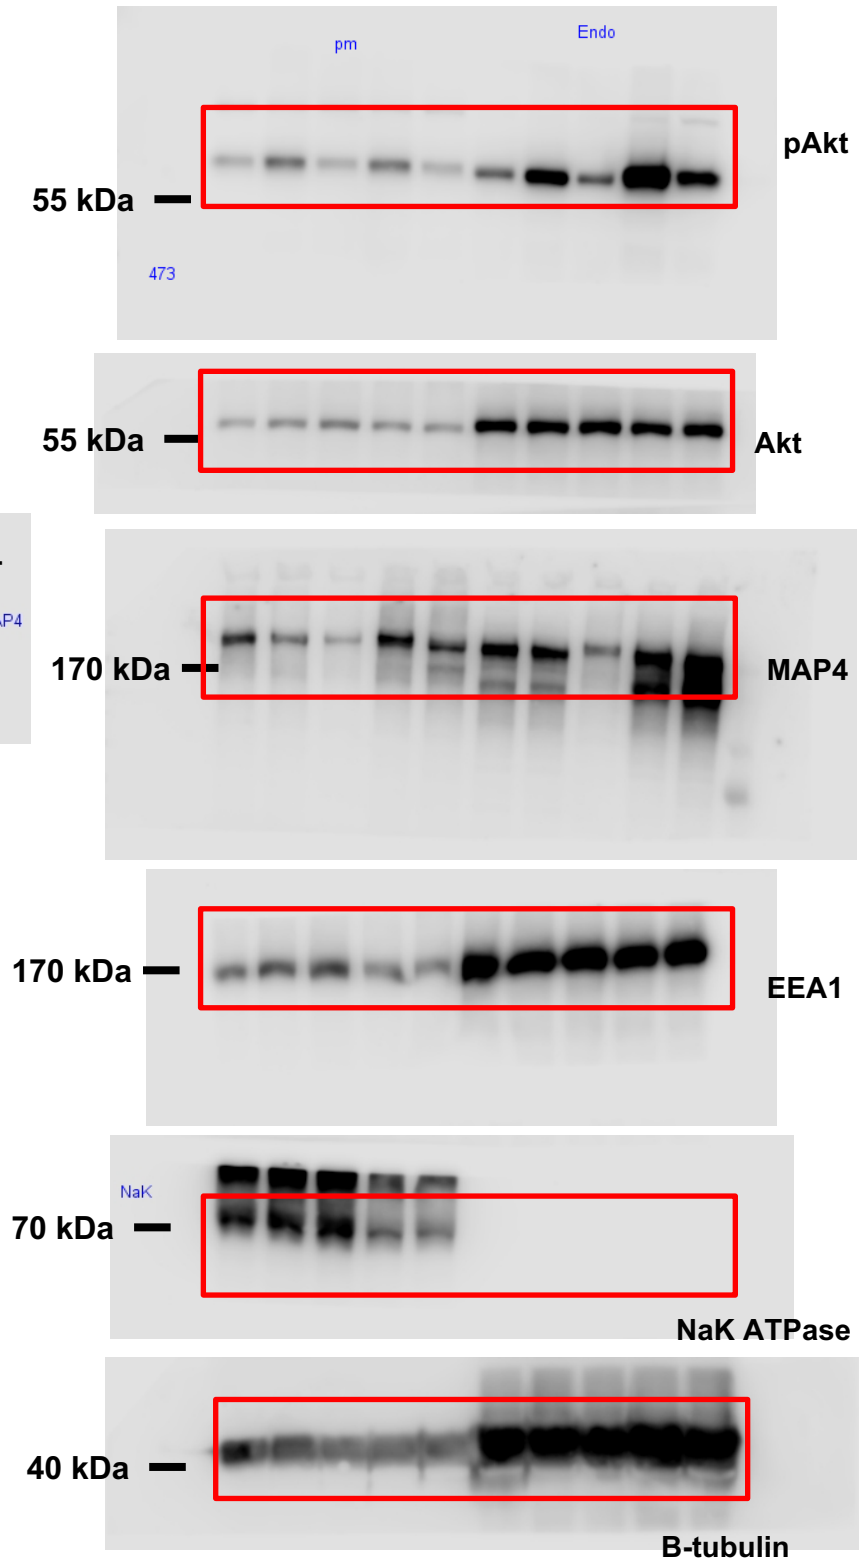

# Fig.7g

MDA-MB-468

HCT116

SCC-1

HeLa

siCon  
siMAP4#1  
siMAP4#2

siCon  
siMAP4#1  
siMAP4#2

siCon  
siMAP4#1  
siMAP4#2

siCon  
siMAP4#1  
siMAP4#2

60 kDa

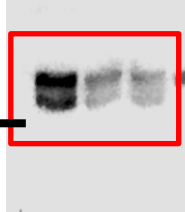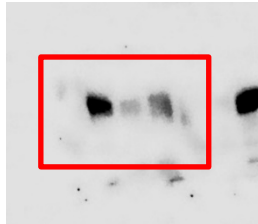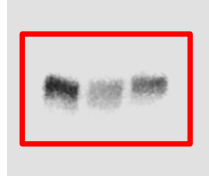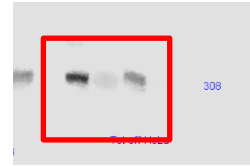

pAkt

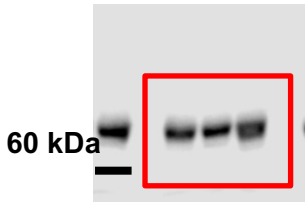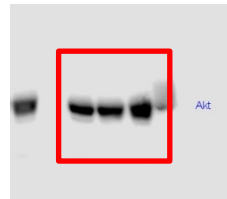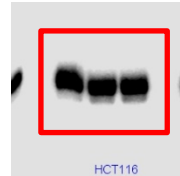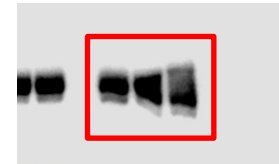

Akt

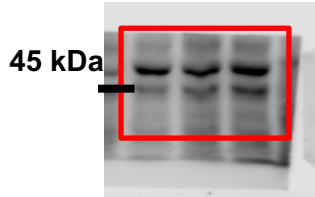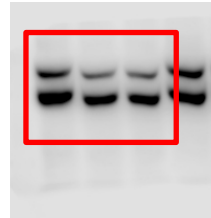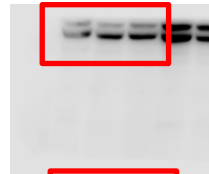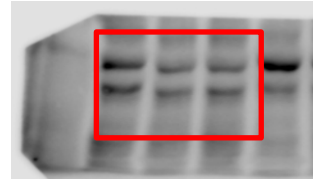

pErk1/2

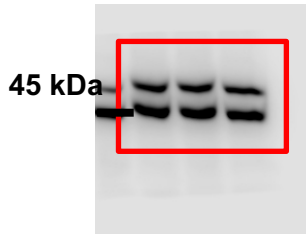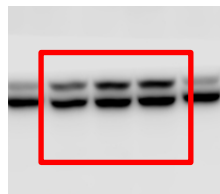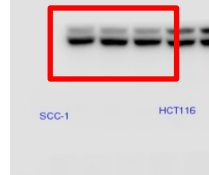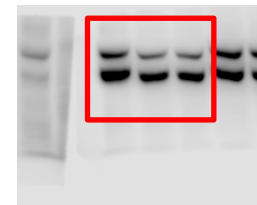

Erk1/2

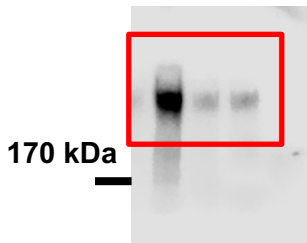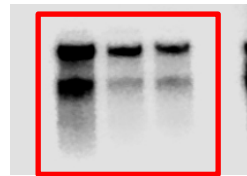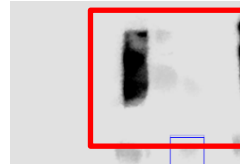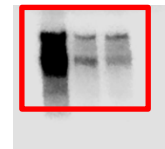

MAP4

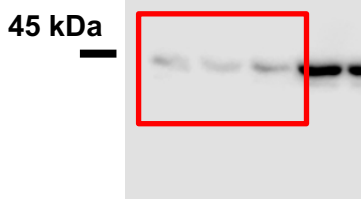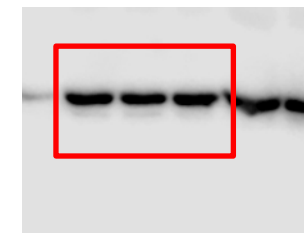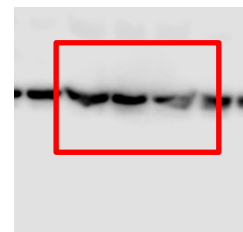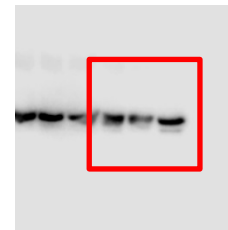

Actin

# Fig.7h

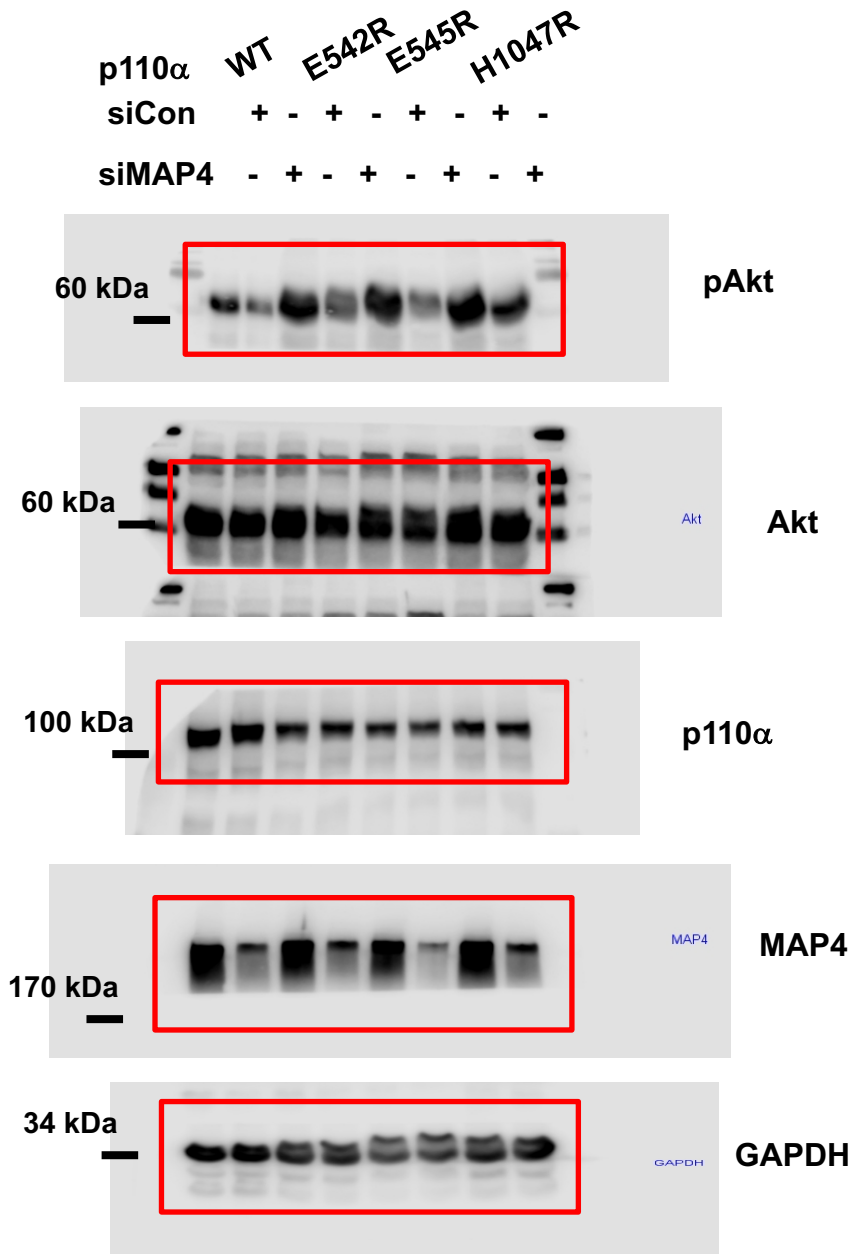

Supplement: NIHMS1689516-supplement-Source_Data_Figure_7.pdf [file NIHMS1689516-supplement-Source_Data_Figure_7.pdf]
