# Supplementary material
Source: PubMed Central journal article supplement (PMC8647654)

# Extended Data Fig.4a

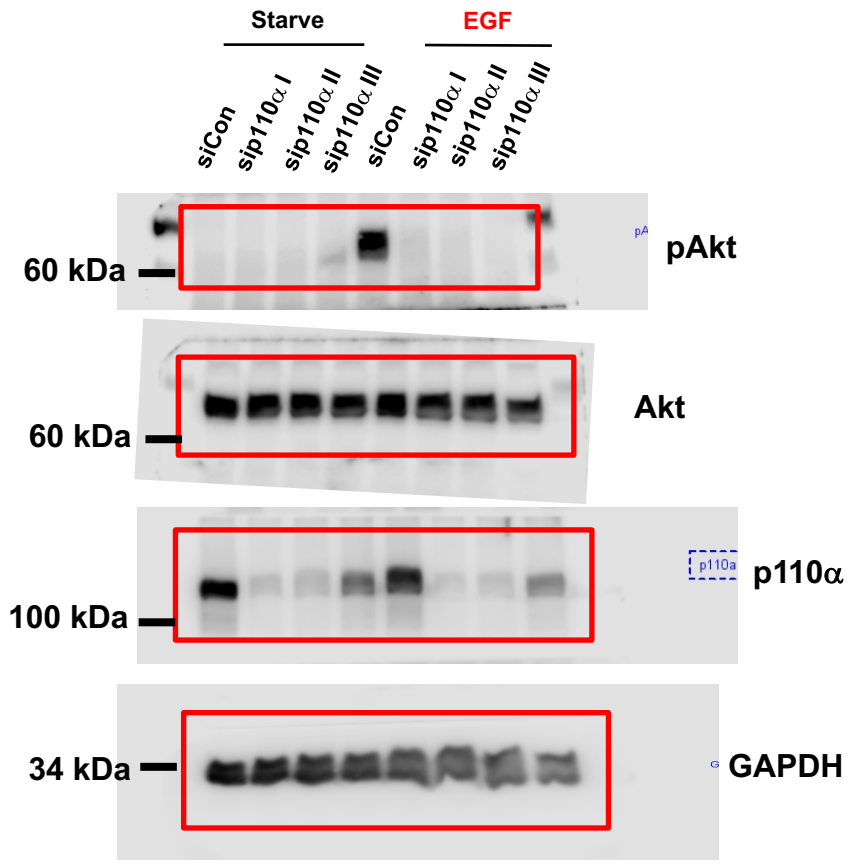

# Extended Data Fig.4b

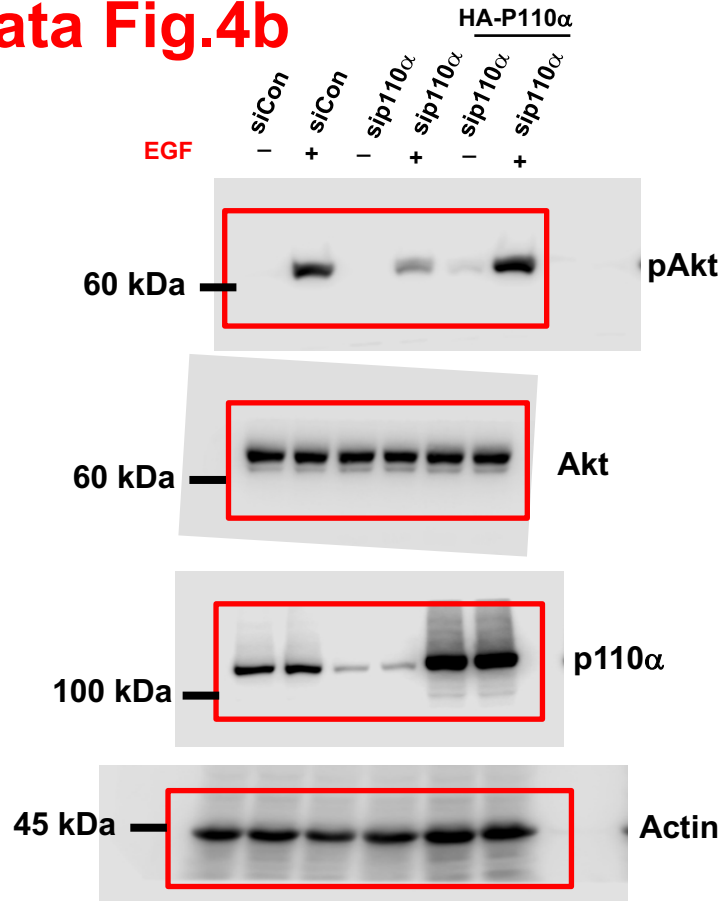

# Extended Data Fig.4e

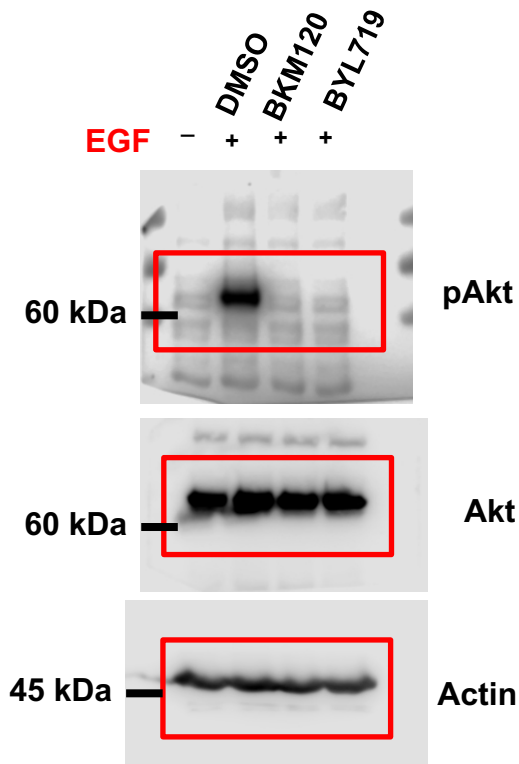

# Extended Data Fig.4h

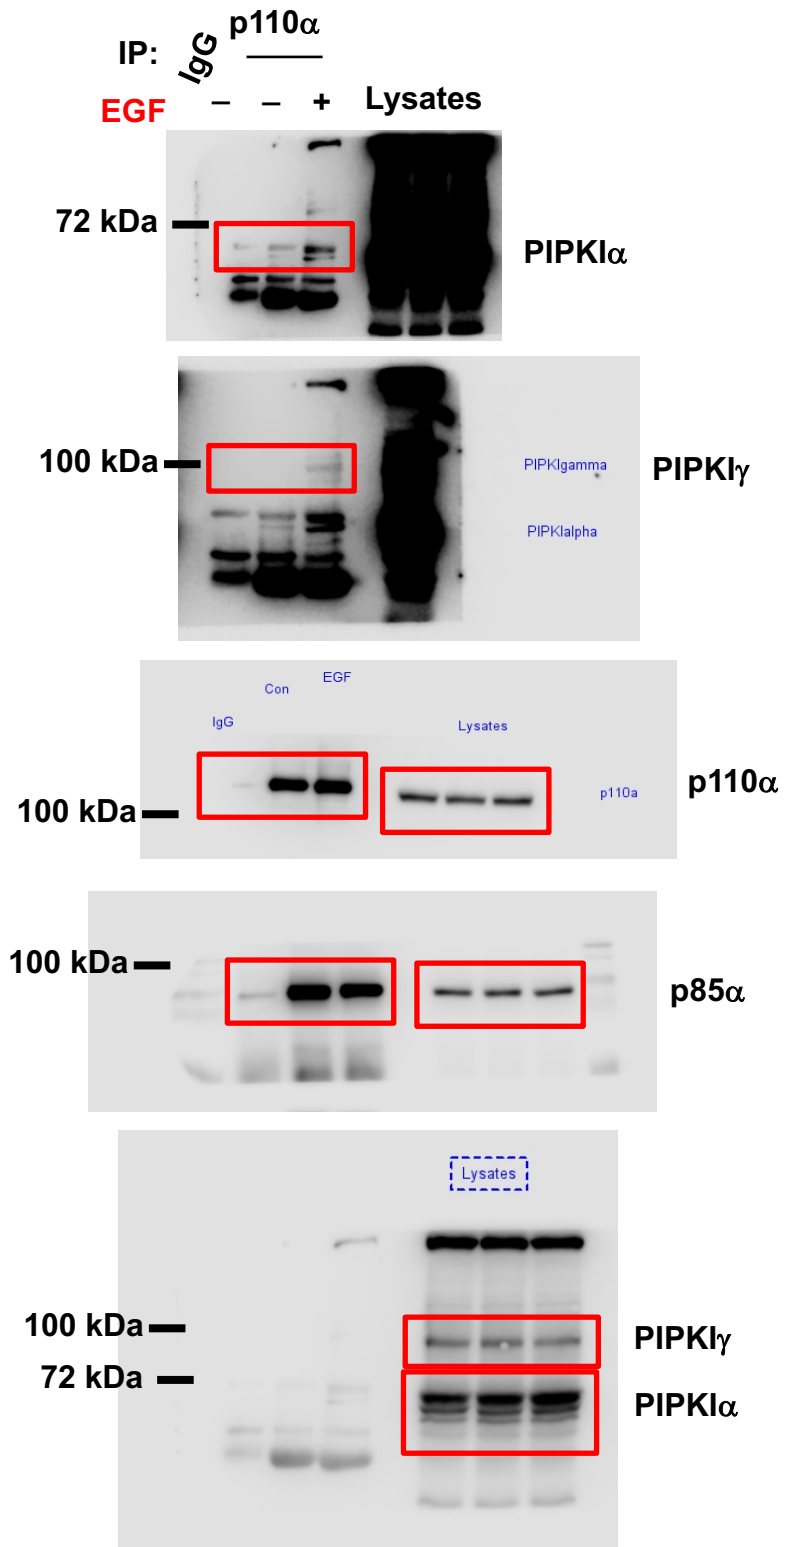

# Extended Data Fig.4i

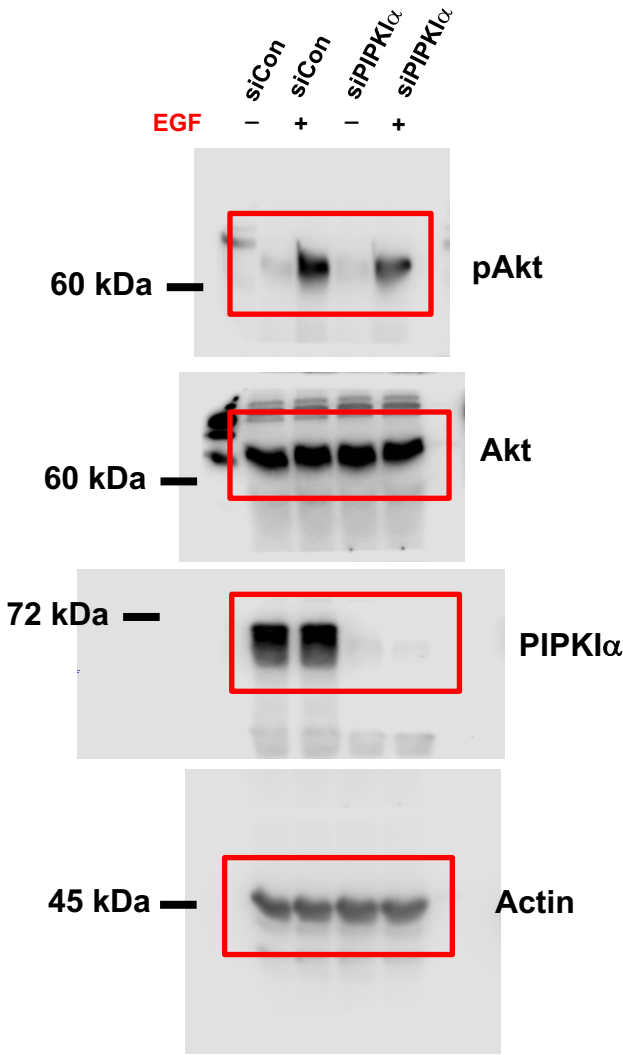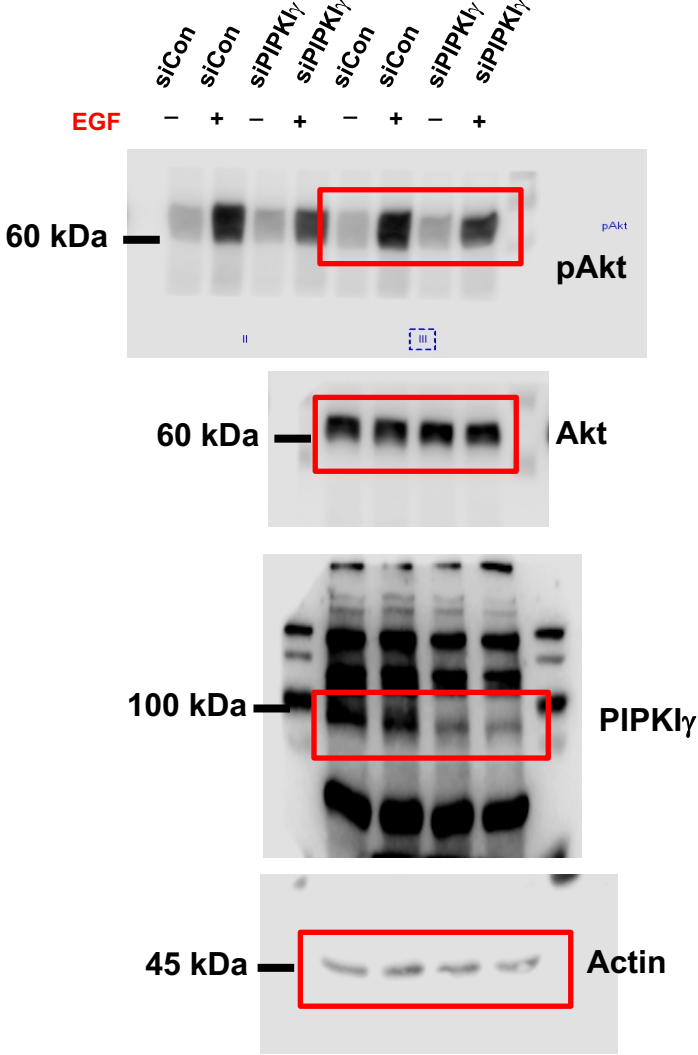

Supplement: NIHMS1689516-supplement-Source_Data_Extended_Data_Figure_4.pdf [file NIHMS1689516-supplement-Source_Data_Extended_Data_Figure_4.pdf]
