# Supplementary material
Source: PubMed Central journal article supplement (PMC8647654)

# Fig.8a

IP: p110 $\alpha$  (HA)

MAP4 - + + +

p110 $\alpha$  - + + +

GFP  
GFP  
GFP-MTBD  
GFP-C-tail

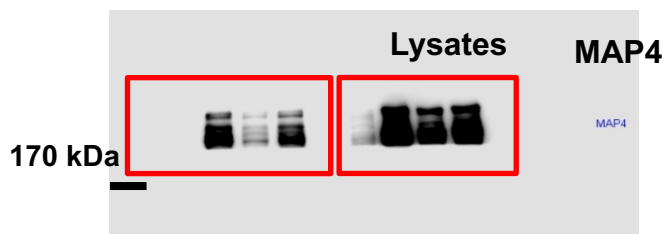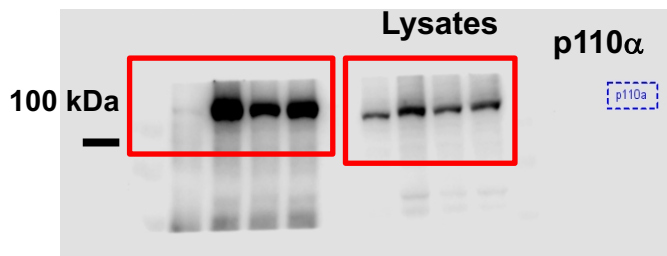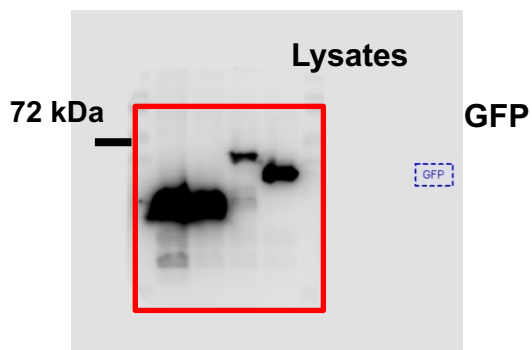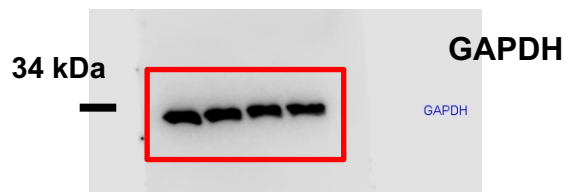

# Fig.8b

EGF - + + + - + + +

GFP  
GFP  
GFP-MTBD  
GFP-C-tail  
GFP  
GFP  
GFP-MTBD  
GFP-C-tail

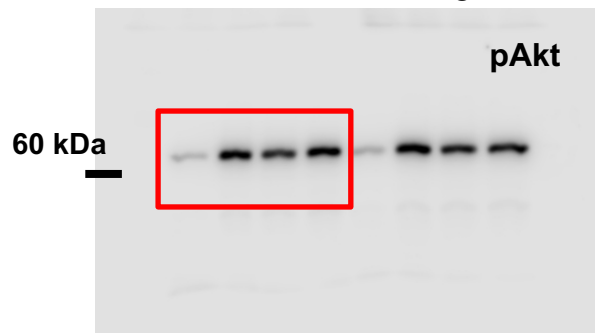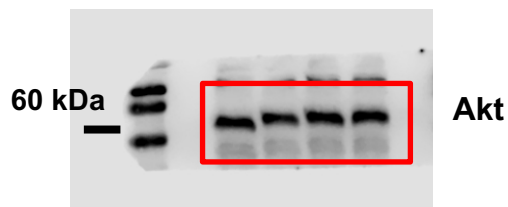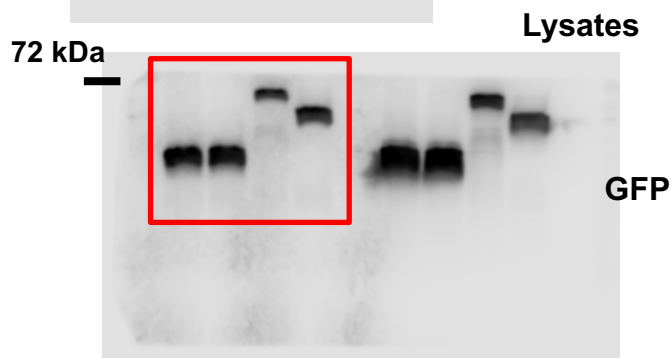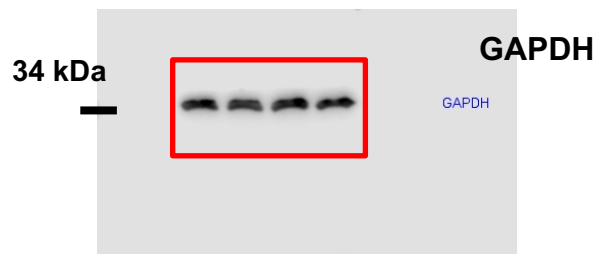

Supplement: NIHMS1689516-supplement-Source_Data_Figure_8.pdf [file NIHMS1689516-supplement-Source_Data_Figure_8.pdf]
