# Supplementary material
Source: PubMed Central journal article supplement (PMC8647654)

# Extended Data Fig.1b

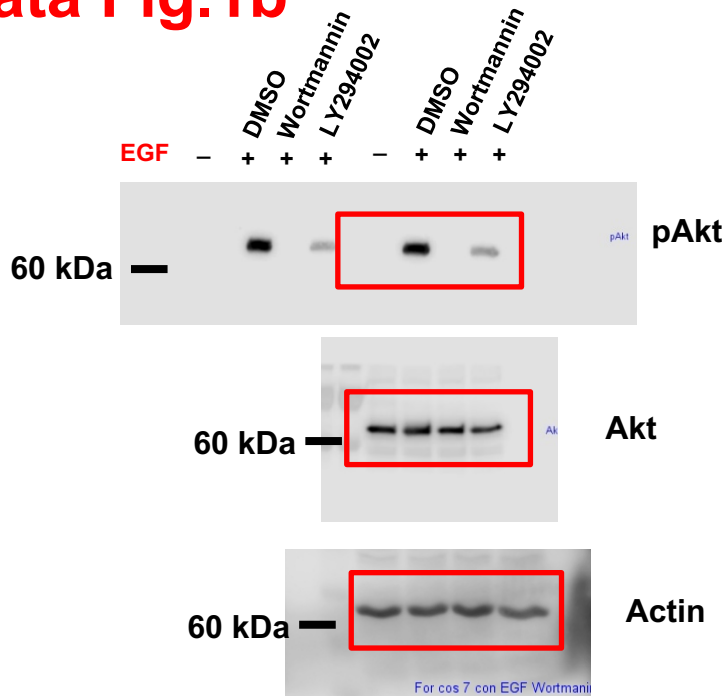

# Extended Data Fig.1d

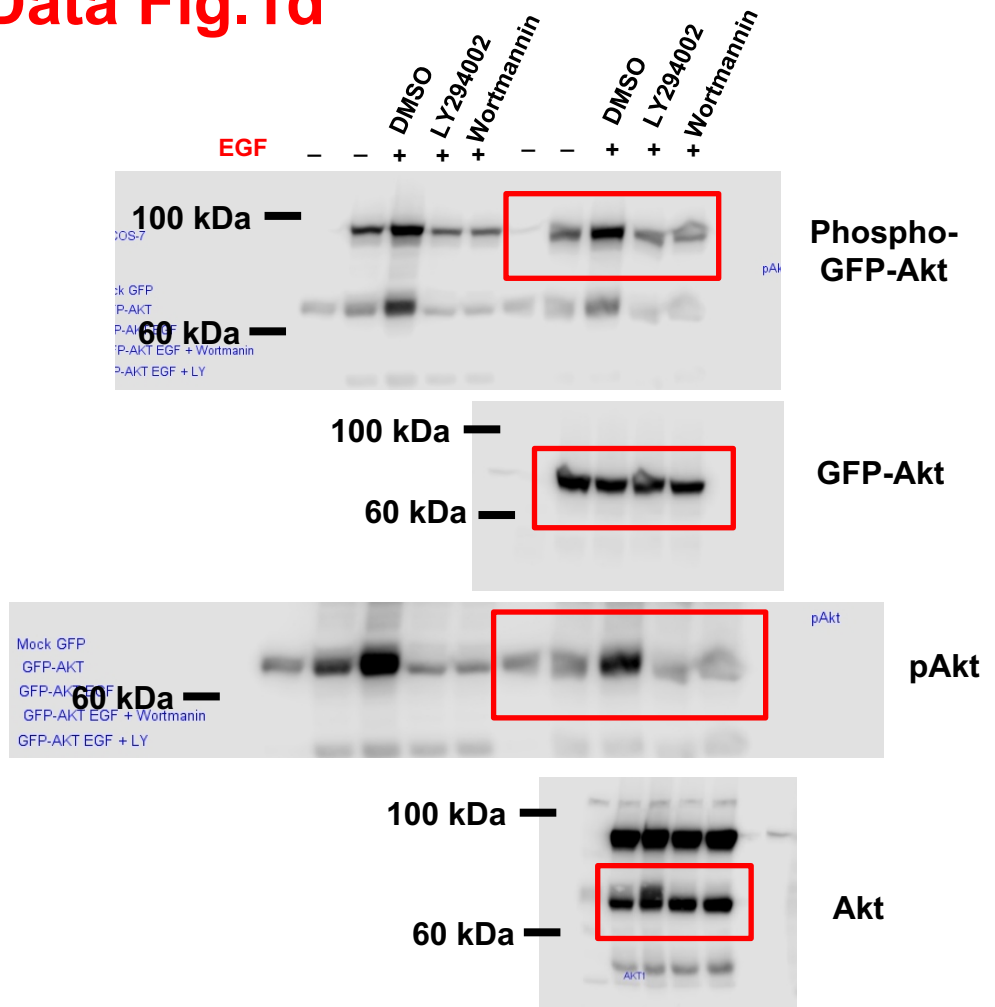

Supplement: NIHMS1689516-supplement-Source_Data_Extended_Data_Figure_1.pdf [file NIHMS1689516-supplement-Source_Data_Extended_Data_Figure_1.pdf]

# Extended Data Fig.2e

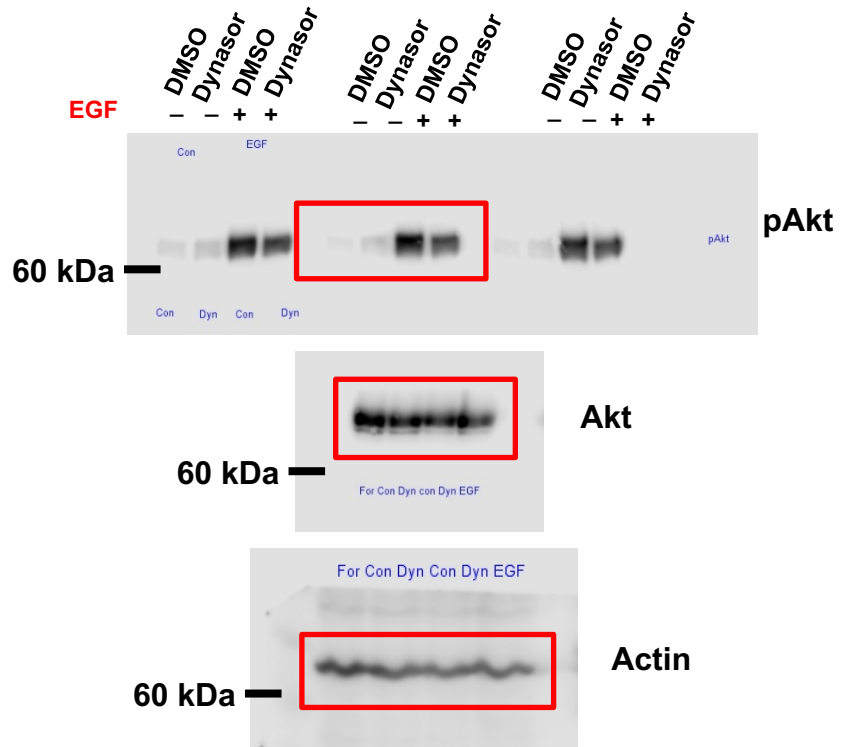

Supplement: NIHMS1689516-supplement-Source_Data_Extended_Data_Figure_2.pdf [file NIHMS1689516-supplement-Source_Data_Extended_Data_Figure_2.pdf]

## Extended Data Fig.3b

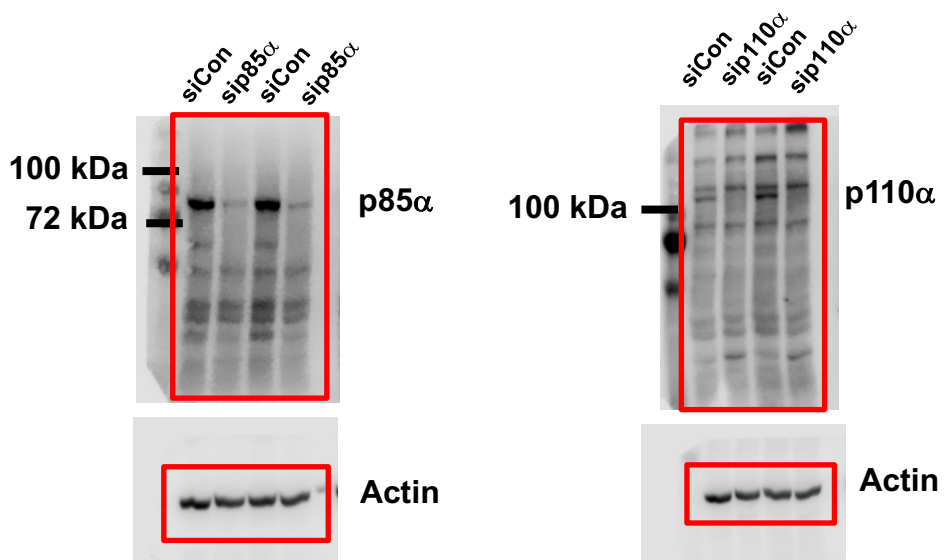

Supplement: NIHMS1689516-supplement-Source_Data_Extended_Data_Figure_3.pdf [file NIHMS1689516-supplement-Source_Data_Extended_Data_Figure_3.pdf]

# Extended Data Fig.5a

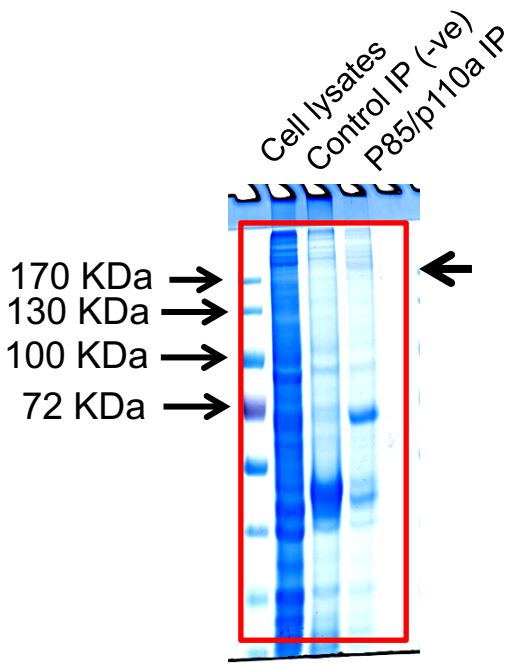

Supplement: NIHMS1689516-supplement-Source_Data_Extended_Data_Figure_5.pdf [file NIHMS1689516-supplement-Source_Data_Extended_Data_Figure_5.pdf]

# Extended Data Fig.6e

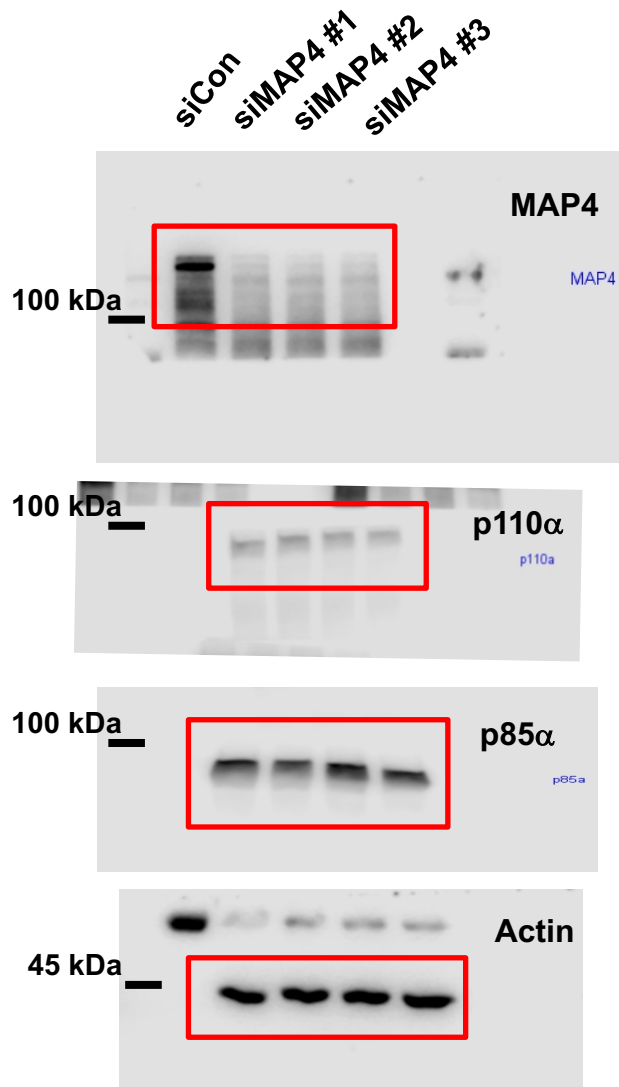

Supplement: NIHMS1689516-supplement-Source_Data_Extended_Data_Figure_6.pdf [file NIHMS1689516-supplement-Source_Data_Extended_Data_Figure_6.pdf]

# Extended Data Fig.8b

# Extended Data Fig.8d

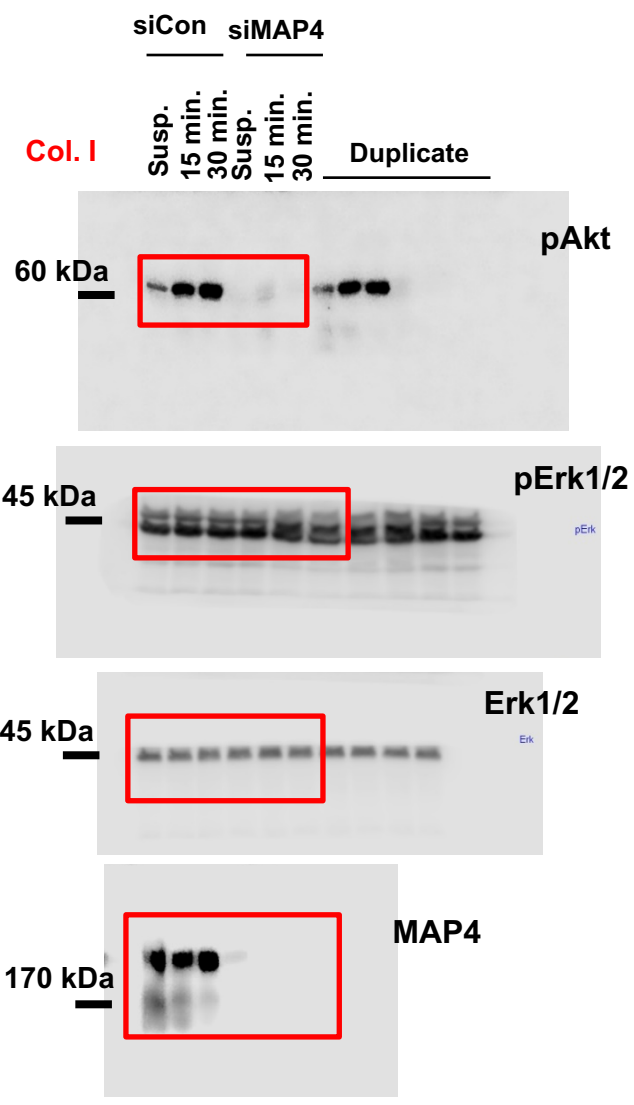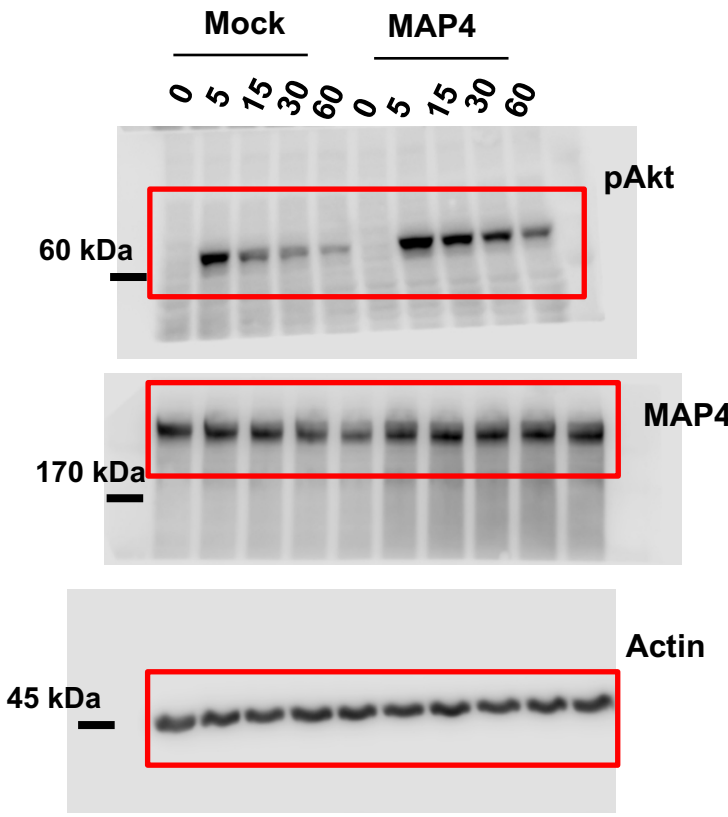

Supplement: NIHMS1689516-supplement-Source_Data_Extended_Data_Figure_8.pdf [file NIHMS1689516-supplement-Source_Data_Extended_Data_Figure_8.pdf]

# Fig.1a

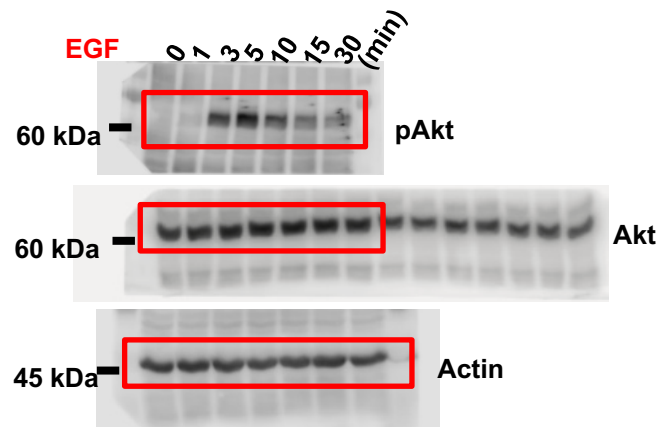

# Fig.1b

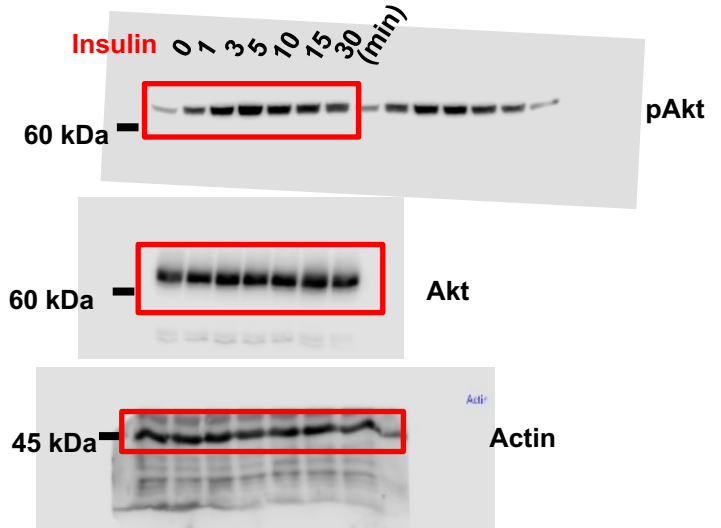

# Fig.1c

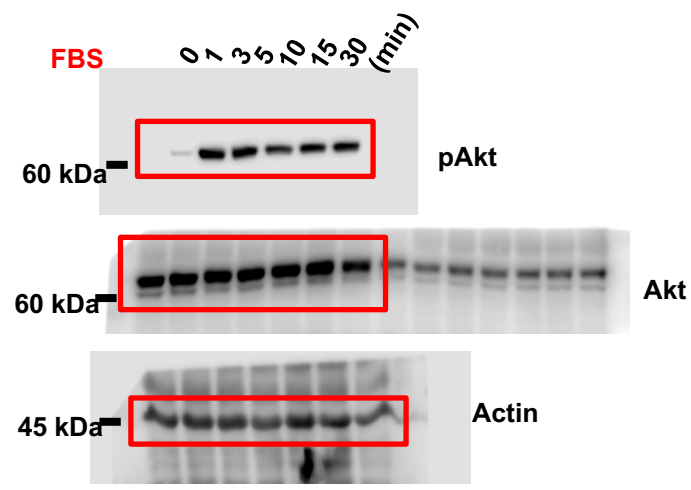

# Fig.1g

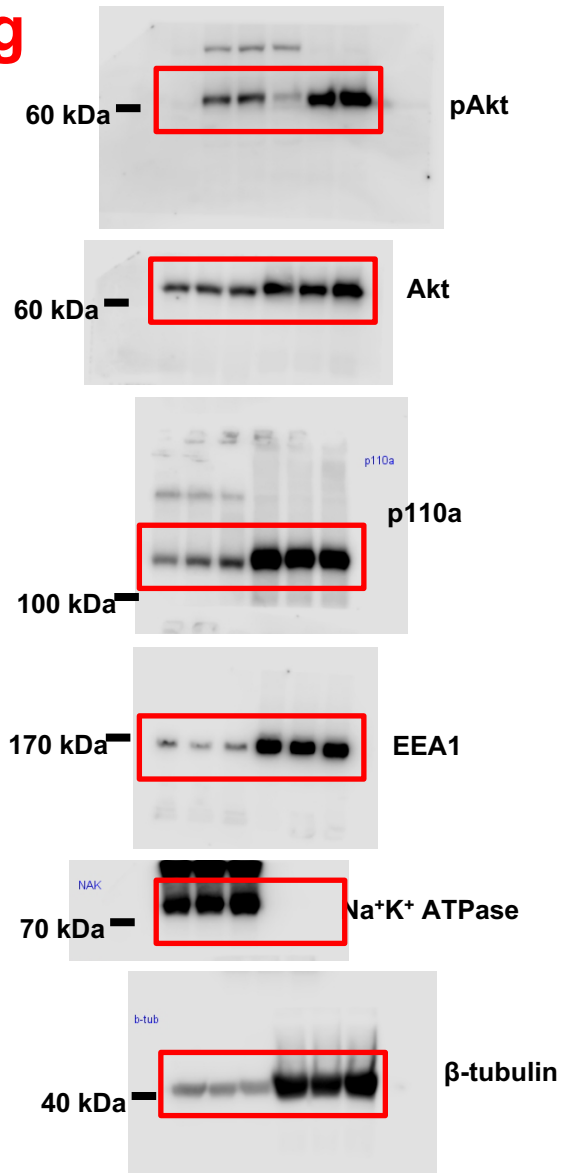

Supplement: NIHMS1689516-supplement-Source_Data_Figure_1.pdf [file NIHMS1689516-supplement-Source_Data_Figure_1.pdf]

### Fig.3b

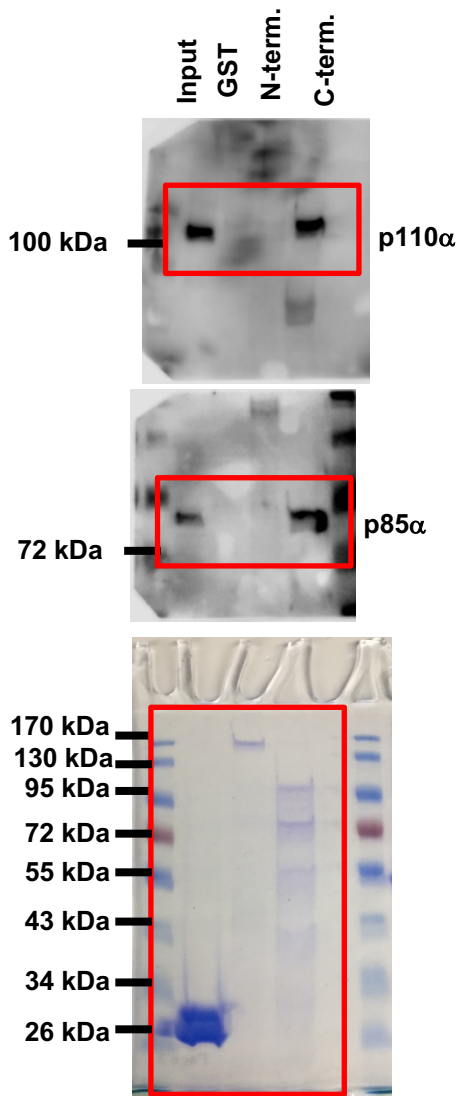

### Fig.3c

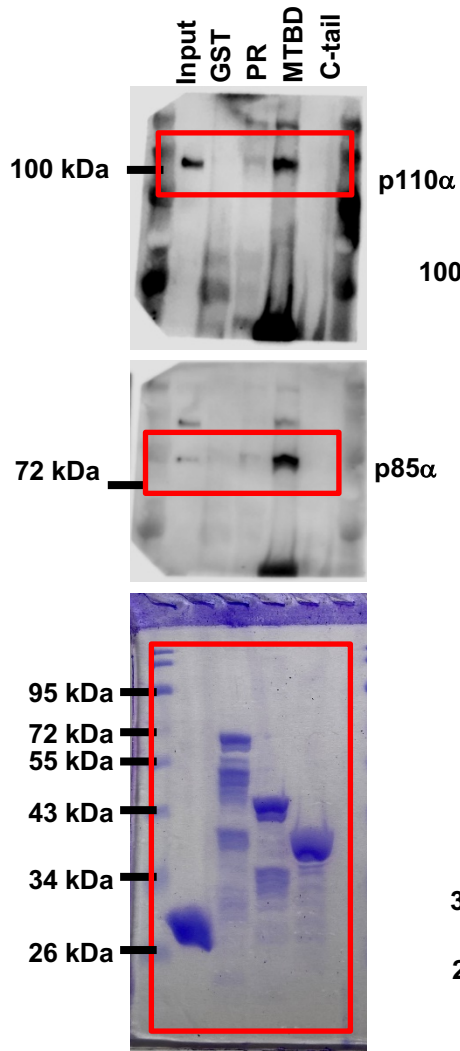

### Fig.3d

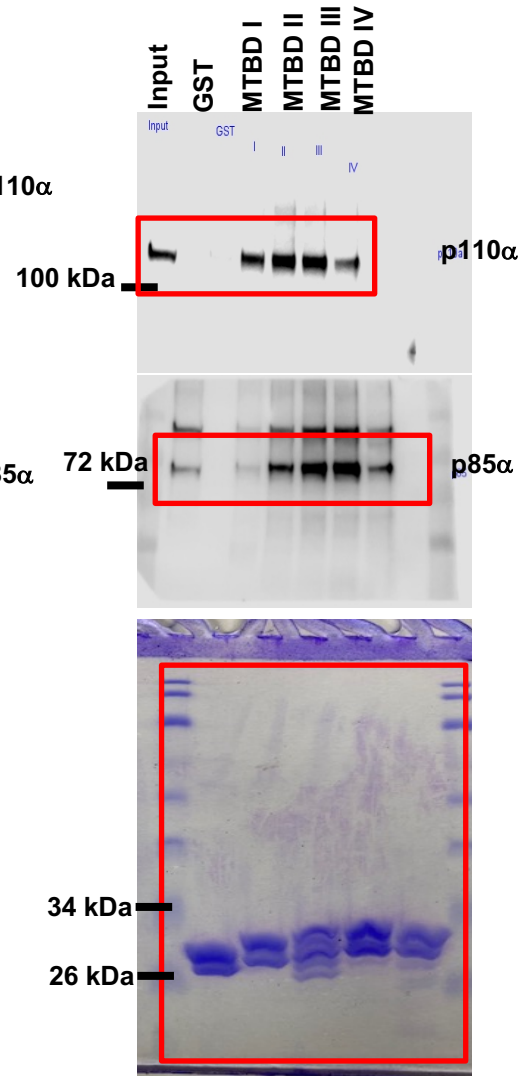

### Fig.3e

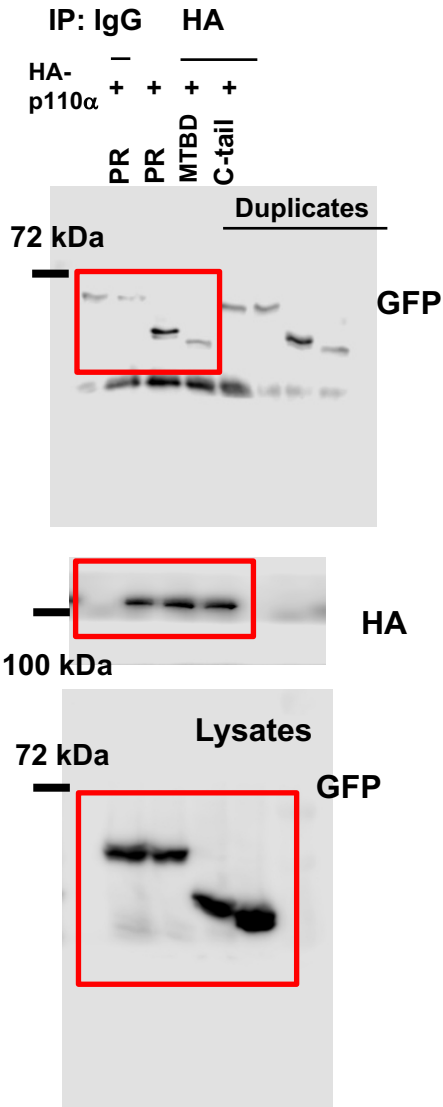

### Fig.3f

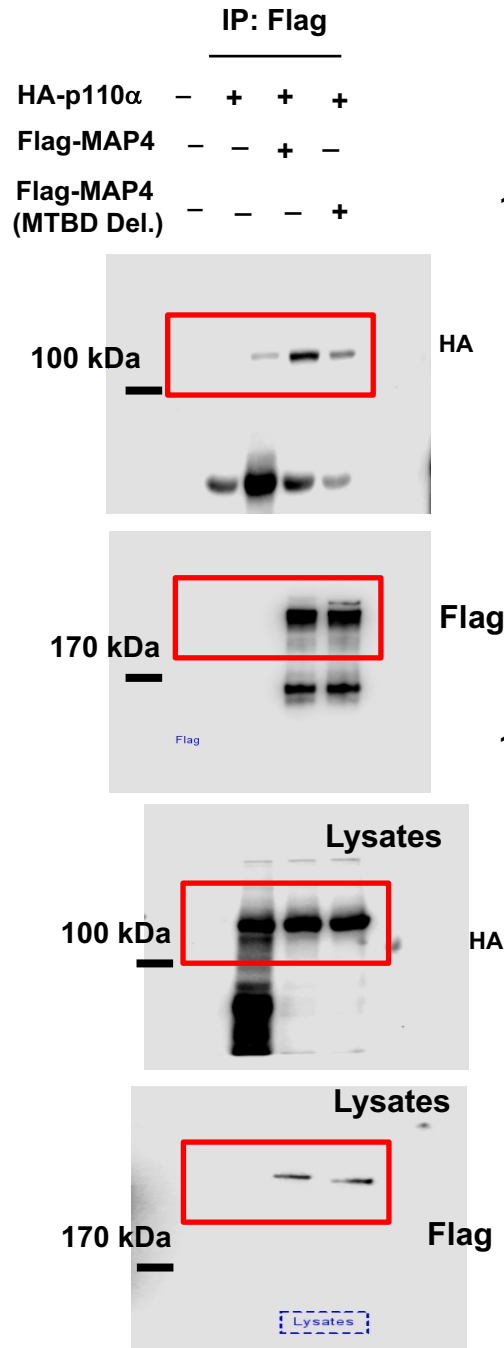

### Fig.3g

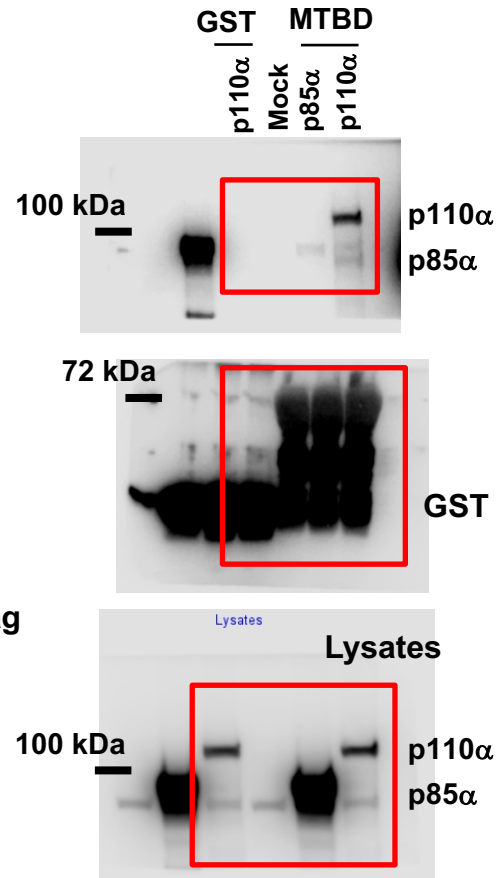

# Fig.3h

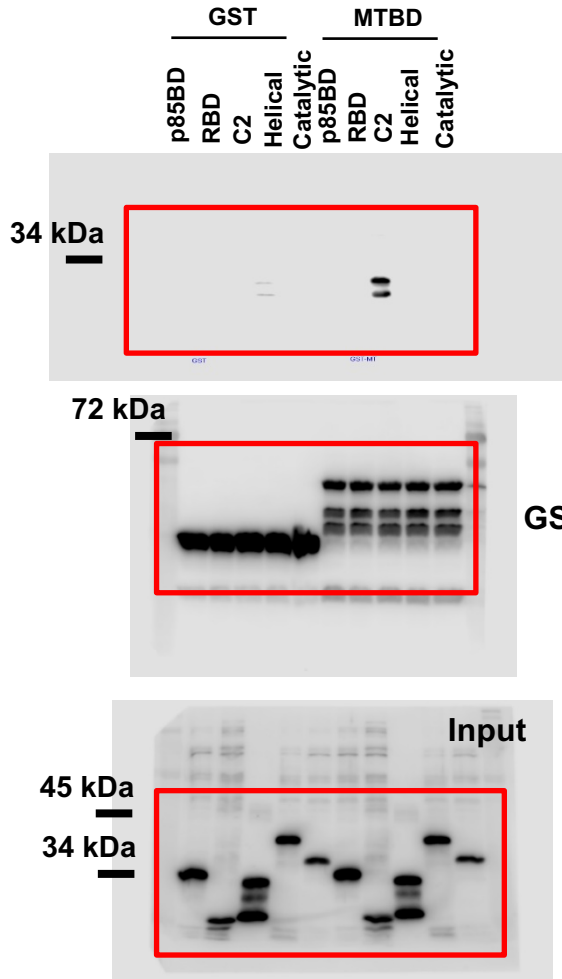

# Fig.3i

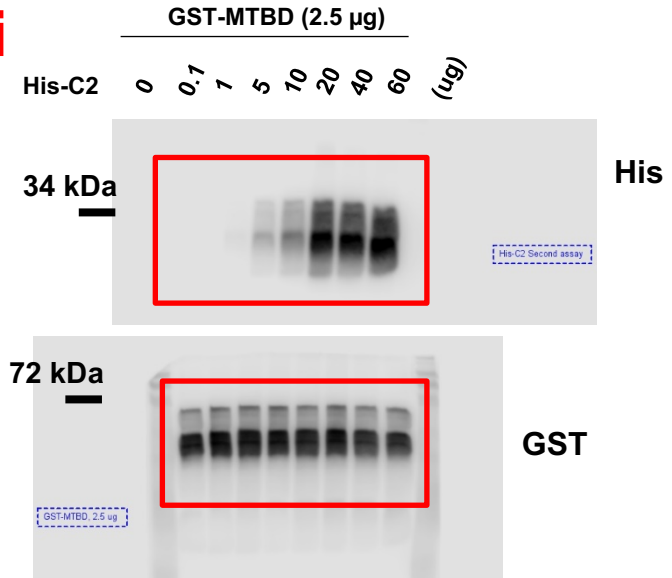

# Fig.3j

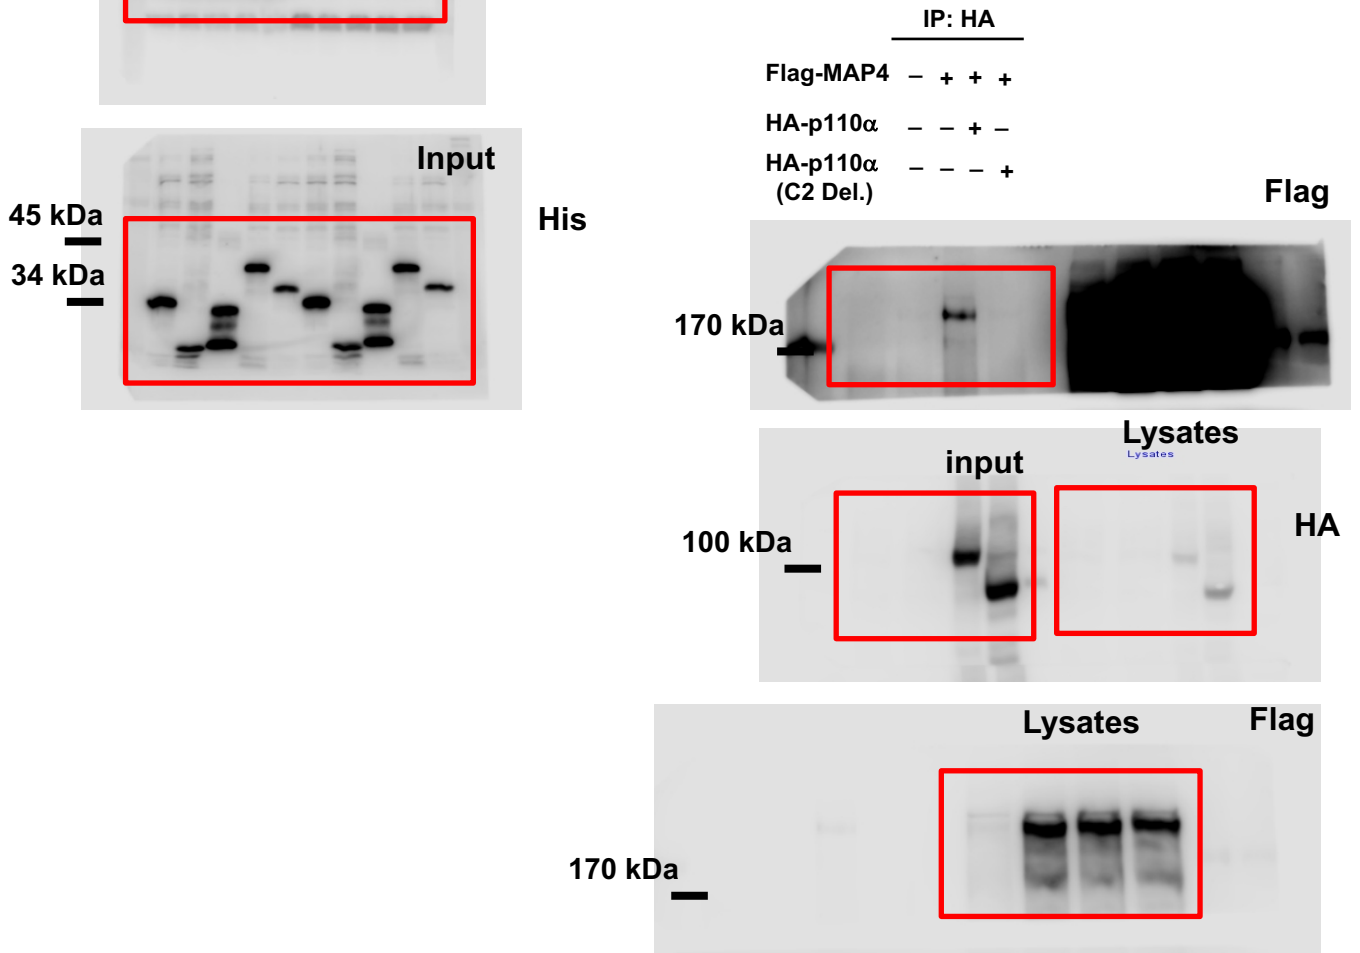

Supplement: NIHMS1689516-supplement-Source_Data_Figure_3.pdf [file NIHMS1689516-supplement-Source_Data_Figure_3.pdf]

**Fig.5e**

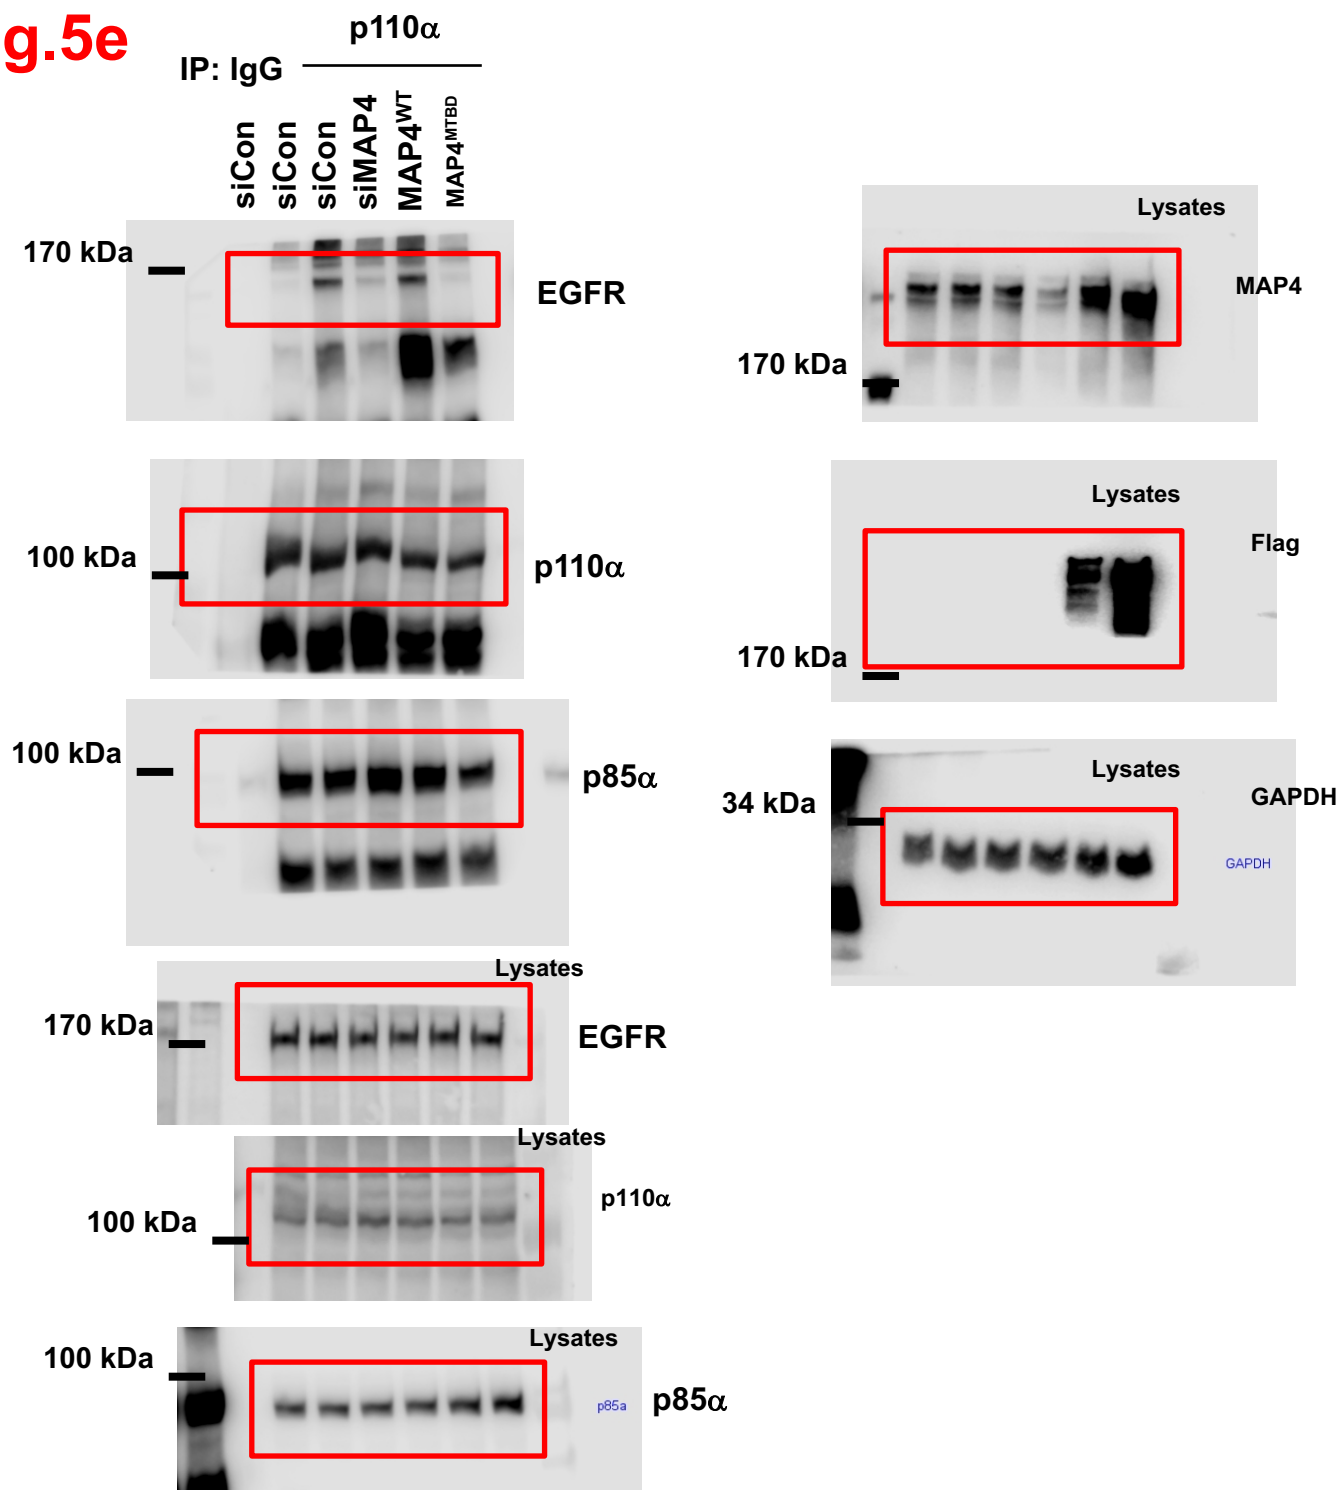

Supplement: NIHMS1689516-supplement-Source_Data_Figure_5.pdf [file NIHMS1689516-supplement-Source_Data_Figure_5.pdf]

### Fig.6b

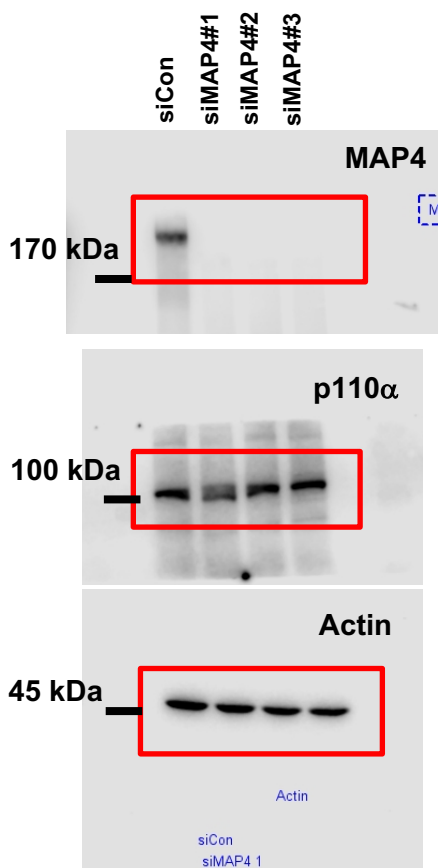

### Fig.6d

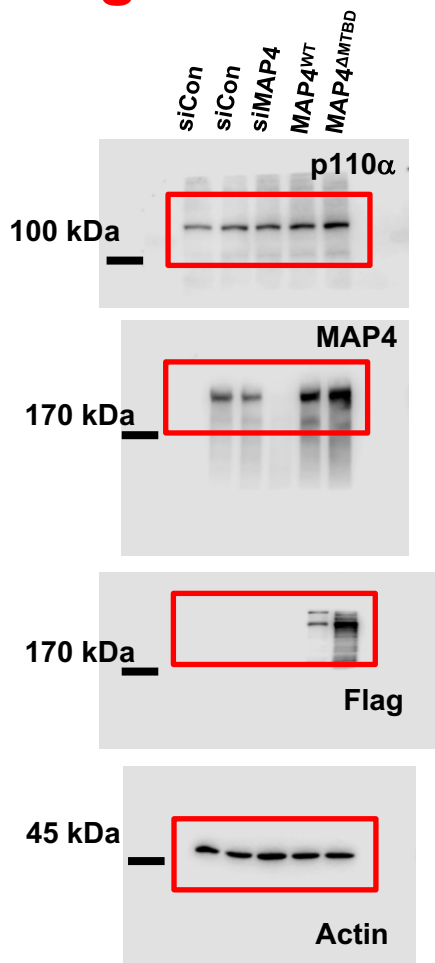

### Fig.6e

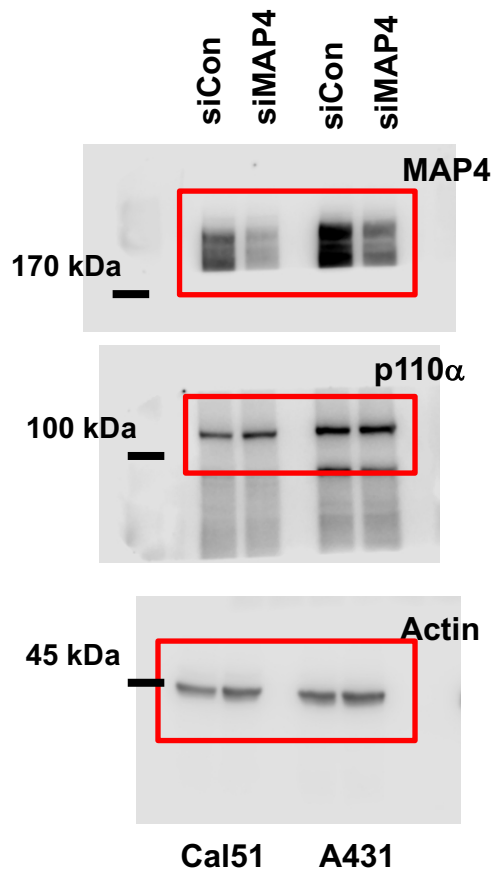

Supplement: NIHMS1689516-supplement-Source_Data_Figure_6.pdf [file NIHMS1689516-supplement-Source_Data_Figure_6.pdf]
